# Supplementary material for: Fluoroquinolone resistance in Campylobacter jejuni and Campylobacter coli from poultry and human samples assessed by PCR-restriction fragment length polymorphism assay
Source: PLoS One. 2018 Jul 6;13(7):e0199974. doi: 10.1371/journal.pone.0199974 (PMC6034818; doi:10.1371/journal.pone.0199974)
Supplement: S1 Table — (XLSX) [file pone.0199974.s001.xlsx]

## Sheet: Feuil1
date_sample	NAL	CIP	NOR
1	32	16	32
2	32	32	32
3	32	4	32
4	32	4	32
5	32	8	32
6	64	16	32
7	32	8	16
8	32	16	16
9	64	32	32
10	64	32	32
11	32	16	16
12	32	32	16
13	32	16	32
14	64	16	32
15	64	16	32
16	64	16	32
17	32	8	16
18	64	32	32
19	32	16	16
20	32	16	16
21	32	4	16
22	32	32	32
23	64	4	32
24	64	16	32
25	64	8	32
26	64	16	32
27	64	8	32
28	32	32	16
29	32	32	32
30	32	8	16
31	64	16	64
32	64	16	16
33	8	0.12	0.5
34	32	8	16
35	64	16	8
36	8	0.12	0.12
37	8	0.12	0.5
38	64	8	16
39	8	0.12	0.25
40	8	0.12	0.25
41	8	0.12	0.25
42	4	0.12	0.12
43	8	0.25	0.5
44	4	0.12	0.25
45	32	8	16
46	4	0.12	0.12
47	8	0.25	0.25
48	4	0.12	0.12
49	8	0.12	0.12
50	8	1	0.5
51	4	0.12	0.12
52	8	0.25	0.5
